# Supplementary material for: Genetic Analysis of the Grapevine GATA Gene Family and Their Expression Profiles in Response to Hormone and Downy Mildew Infection
Source: MDPI journal article supplement (doi:10.3390/horticulturae8040303), 2022-04-03
Supplement: s1 [file s1]

# Genetic analysis of the grapevine (*Vitis vinifera* L.) GATA gene family reveals a putative resistance-related member important for innate immunity

Tingting Chen 1,2,3,†, Jing Peng 1u,3,†, Meijie Li 1,3, Mengru Dou

1,3, Yan Lei 4, Yuejing Wang 1,3 and Yan Xu 1,3,\*Supplementary

Date

|           |                                                                         |     |
|-----------|-------------------------------------------------------------------------|-----|
| VvGATA27  | MGKHGPCYHCGVTNTPLVRNGPPEKPVLCNACGSRWRTKGTLENYTPLHARVDGDDAEDYRVS         | 69  |
| AT4G17570 | MGKHGPCYHCGVTNTPLVRNGPPEKPVLCNACGSRWRTKGTLVNYTPLHARADGDENDDHRFQRMKSI    | 70  |
| VvGATA27  | I..NKNKEVKLLKRKQNDNVVNGVASDYSQGSRK.AIDEDITSNRSSSGSAISNSESQAQFGSADASDLT  | 137 |
| AT4G17570 | LGKNKNEIKMLKRKAIQENIIIKRPVFEFSYGLKAAVLEEDASNRSSSGSAVSNSESQAQFSSADGS...  | 137 |
| VvGATA27  | GPSQSI.VMDTMVPSRKRTCVRPKPSSVEKLTKDLCTLIHEQQSSYFSGSSEEDLLFESETPMWSVEIGH  | 207 |
| AT4G17570 | .PSQSNAMDITTPCKRRTCVRPKPSSVEKLTKDLYNLHQEQSSCLSVSSEEDLLFENEMSWWSVEIGH    | 206 |
| VvGATA27  | GSVLI.RHPSAIGREEESEASSLSVDNKSYLVNEVYSRIGALPVNTNNKGINFPSPGLEKMKKPAGLGMQC | 277 |
| AT4G17570 | GSVLMKNPHSFAREEESEASSLSSENKSSISDAYSD.....HSVKRVEIGAVRGSYYGGQTIKQ        | 265 |
| VvGATA27  | EQTQRDKSCHEKLQILANFINSPLRSIDLKDVNFEEFVGHILTNEEQQLQLKYLPSEDTAKLPDSLKSMFD | 347 |
| AT4G17570 | EQFKRTKSQTERVHVLGSHGSPLCISIDLKDVNFDEFIEQFTFEEQKKLMNLLPQIDSDDLPHSLRMVFE  | 335 |
| VvGATA27  | SPQFKESLSFFQQLLGEGVFDISFP.GVKAEDCKTLQRLALLNSEKSKWVEHYNLLKKCKNSTGVSVVAG  | 416 |
| AT4G17570 | SAQFKDNFSLFQQLIADGVFDVSSSSGAKLEEIRTFKKLALTDFNKSRLVESYNLLKEREKGTGDSVTTT  | 405 |
| VvGATA27  | EPKAI.AAS..NFANAKRSRDAQNFSEARTTMKSPRVI.MKAVEKEHIDNEGSSFSRPSLFALPPDGCS   | 484 |
| AT4G17570 | SKSSI.PNVPKNI.VTIKRRYENQICVKSESRLMRSPKRVMMKASHETENNIVSCFRPRSLASVFAQECG  | 474 |
| VvGATA27  | LELDSFTFGDEISDHL.LLDVPSNNSFPQAEELLHPGSGFGTQLQSTSSSSAYPHLLRP             | 542 |
| AT4G17570 | SAVFSYEGNCSSDQDL.LLLDLPSNGSFQAEELLH.....QL                              | 510 |

**Figure S1.** Sequence analysis of the VvGATA27 and AT4G17570

the sequence alignment of the VvGATA27 and AT4G17570, and indicated that the

VvGATA27 showed sequence identity (up to 52.01%) to AT4G17570.

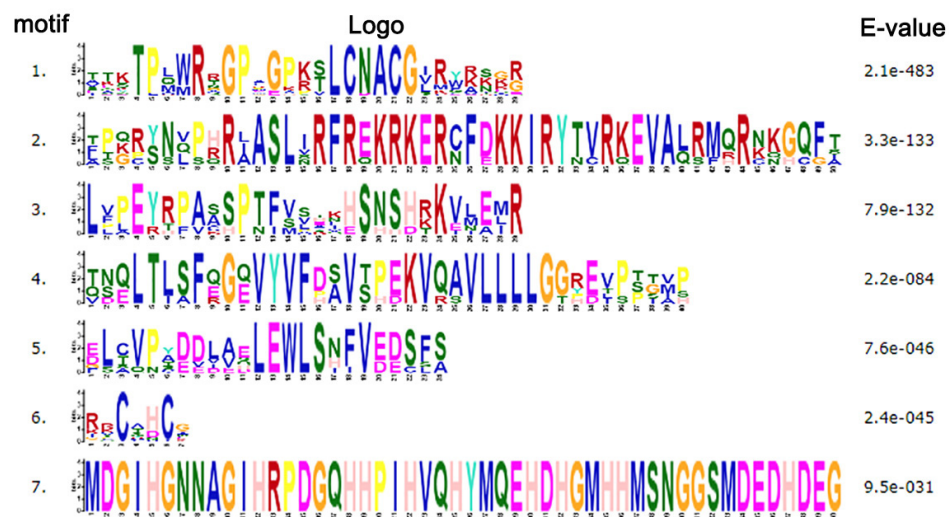

**Figure S2.** Identification of conserved structural domains within VvGATA proteins.

Conserved regions and domain identities were determined by MEME

(<https://meme-suite.org/meme/tools/meme>).

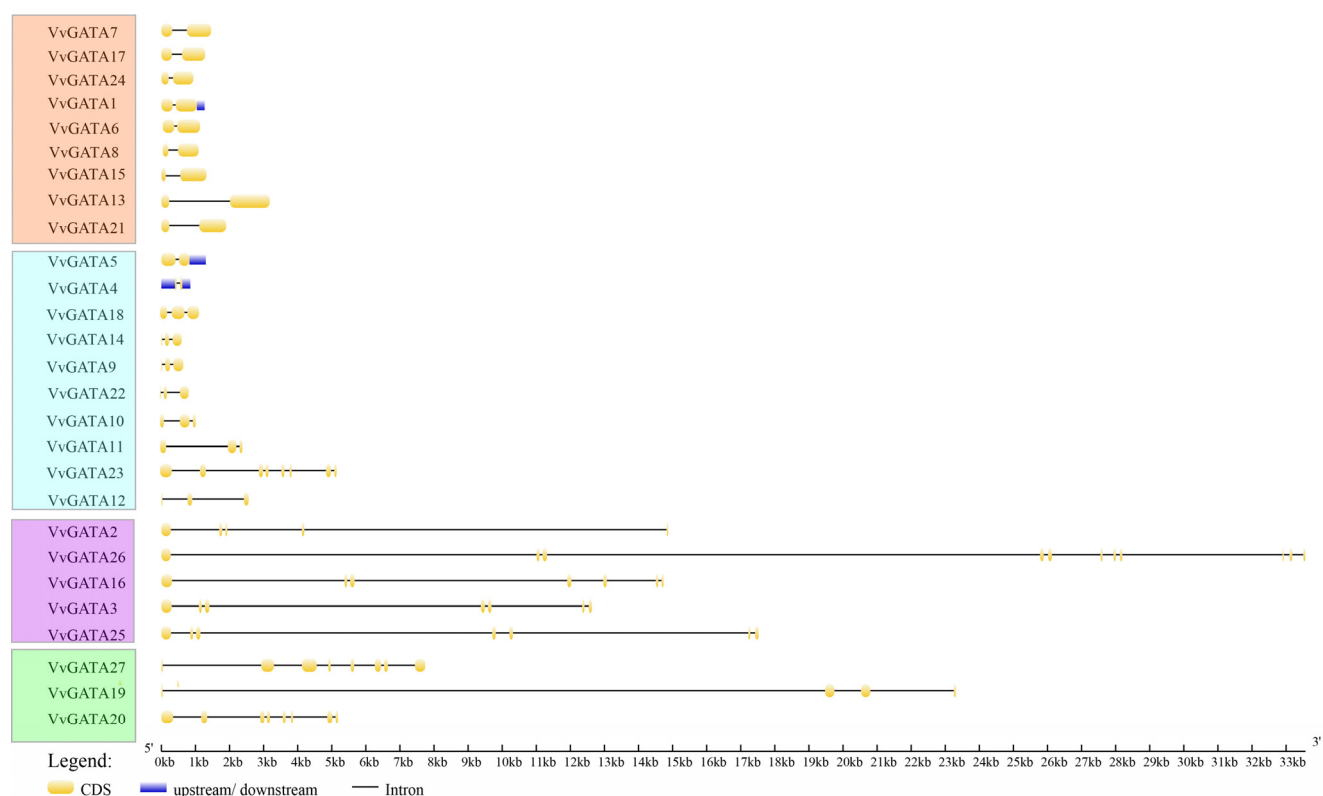

**Figure S3.** Exon/intron organization of VvGATA family genes were illustrated using the Gene Structure Display Server
